# Supplementary material
Source: Springer Nature journal article supplement (https://www.springermedizin.de/resource/supplementary/12891_2010_972_MOESM2_ESM.pdf/9506826)
Supplement: MOESM2 [file 9506826]

**Physical Function**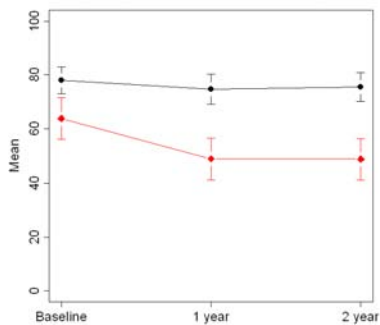**Physical Role**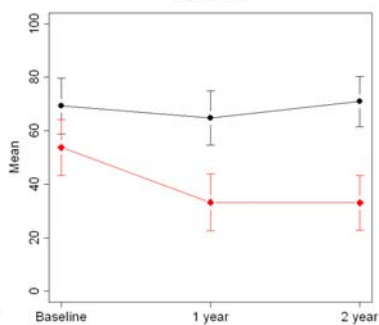**Bodily Pain**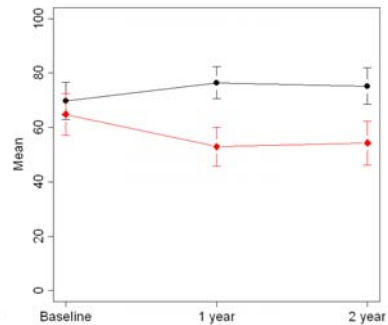**General Health**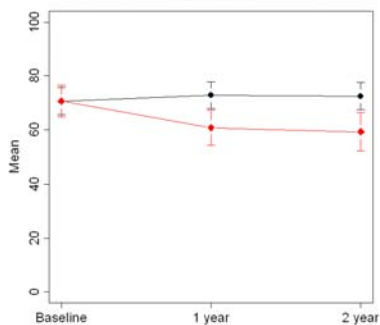**Vitality**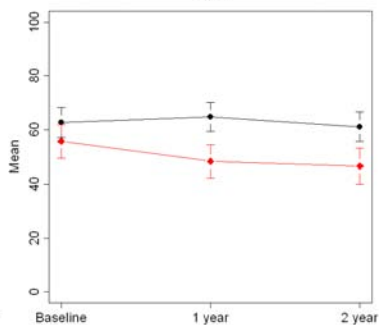**Social Function**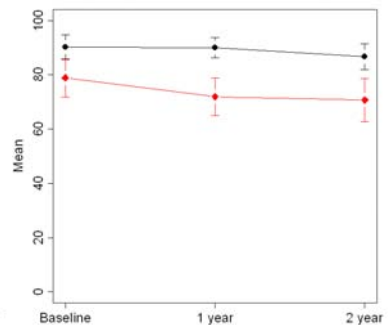**Emotional Role**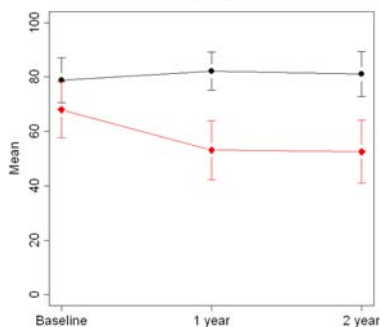**Mental Health**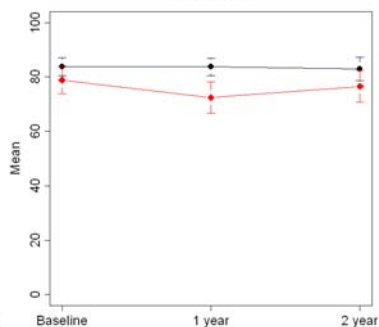**QOLS**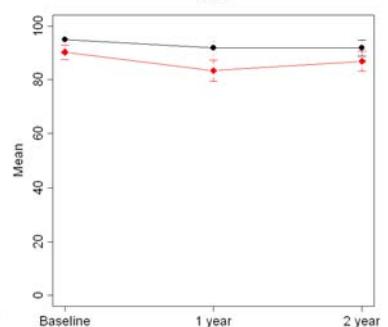

● Controls

◆ Patients with hip fracture
